# Supplementary material for: Massively parallel identification of functionally consequential noncoding genetic variants in undiagnosed rare disease patients
Source: PubMed Central journal article supplement (PMC9085742; doi:10.1038/s41598-022-11589-8), 2022-05-09

Figure S1

**a**

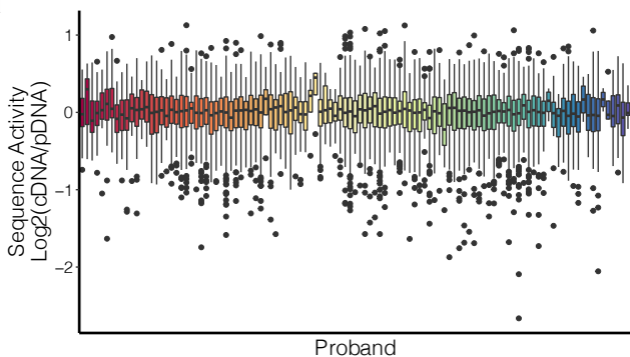

**b**

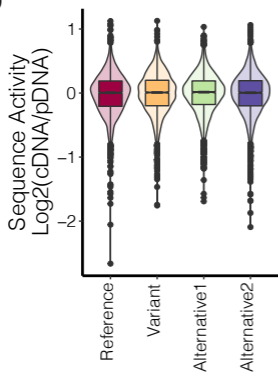

**c**

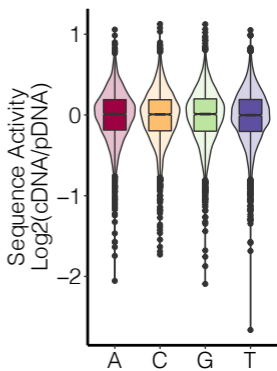

**d**

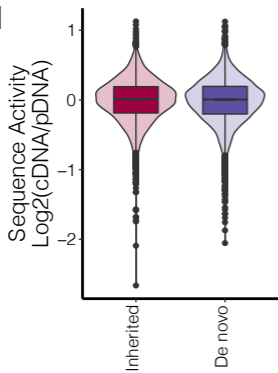

**e**

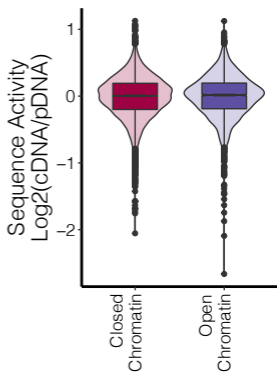

Supplement: 41598_2022_11589_MOESM1_ESM.pdf [file 41598_2022_11589_MOESM1_ESM.pdf]
